# Supplementary material
Source: HighWire-hosted journal article supplement (https://jnm.snmjournals.org/highwire/filestream/111907/field_highwire_adjunct_files/0/265215_Supplemental_Data.pdf)
Supplement: 265215_Supplemental_Data.pdf [file 265215_Supplemental_Data.pdf]

## 7. Physician Survey Preimaging

|                                                                                        |                                                                                                                                                                                                                                                                                                                                                                                                                                                                                                                                    |
|----------------------------------------------------------------------------------------|------------------------------------------------------------------------------------------------------------------------------------------------------------------------------------------------------------------------------------------------------------------------------------------------------------------------------------------------------------------------------------------------------------------------------------------------------------------------------------------------------------------------------------|
| Record ID                                                                              | <input type="text"/>                                                                                                                                                                                                                                                                                                                                                                                                                                                                                                               |
| <b>PRE-IMAGING SURVEY (QUESTIONNAIRE 1)</b>                                            |                                                                                                                                                                                                                                                                                                                                                                                                                                                                                                                                    |
| Date of survey                                                                         | <input type="text"/>                                                                                                                                                                                                                                                                                                                                                                                                                                                                                                               |
| Q1: Indicate summary of disease location                                               | <input type="text"/><br>(Please mention local lesions, involved lymph nodes, as well as visceral and bone mets)                                                                                                                                                                                                                                                                                                                                                                                                                    |
| Q2: If FAPI PET scan was not available, which additional imaging test would you order? | <input type="checkbox"/> MRI<br><input type="checkbox"/> CT<br><input type="checkbox"/> Ultrasound<br><input type="checkbox"/> FDG/Choline/Acetate/PSMA/DOA PET<br><input type="checkbox"/> Bone scan/Fluoride PET<br><input type="checkbox"/> Biopsy, image-guided<br><input type="checkbox"/> Other                                                                                                                                                                                                                              |
| Other (provide description)                                                            | <input type="text"/>                                                                                                                                                                                                                                                                                                                                                                                                                                                                                                               |
| Q3. What would be your next step in management, if you were not to order this study?   | <input type="checkbox"/> Surgery/local resection<br><input type="checkbox"/> Radiation therapy or similar local targeting<br><input type="checkbox"/> Chemotherapy<br><input type="checkbox"/> Hormone therapy<br><input type="checkbox"/> Immune therapy<br><input type="checkbox"/> Radionuclide therapy<br><input type="checkbox"/> Bone targeted therapy<br><input type="checkbox"/> Modify dose of existing therapy<br><input type="checkbox"/> Active surveillance<br><input type="checkbox"/> Other (please describe below) |
| What was the other type of management listed                                           | <input type="text"/>                                                                                                                                                                                                                                                                                                                                                                                                                                                                                                               |
| Name of person signing the form                                                        | <input type="text"/>                                                                                                                                                                                                                                                                                                                                                                                                                                                                                                               |
| Please sign this form                                                                  | <input type="text"/>                                                                                                                                                                                                                                                                                                                                                                                                                                                                                                               |

## 8. Physician Survey Postimaging

|                                                                                      |                                                                                                                                                                                                                                                                                                                                                                                                                                                                                                                                    |
|--------------------------------------------------------------------------------------|------------------------------------------------------------------------------------------------------------------------------------------------------------------------------------------------------------------------------------------------------------------------------------------------------------------------------------------------------------------------------------------------------------------------------------------------------------------------------------------------------------------------------------|
| Record ID                                                                            | <input type="text"/>                                                                                                                                                                                                                                                                                                                                                                                                                                                                                                               |
| <b>POST-IMAGING SURVEY (QUESTIONNAIRE 2)</b>                                         |                                                                                                                                                                                                                                                                                                                                                                                                                                                                                                                                    |
| Date of survey                                                                       | <input type="text"/>                                                                                                                                                                                                                                                                                                                                                                                                                                                                                                               |
| Q1: Indicate a summary of disease location                                           | <input type="text"/><br>(Please mention local lesions, involved lymph nodes, as well as visceral and bone mets)                                                                                                                                                                                                                                                                                                                                                                                                                    |
| Q2: Did the FAPI PET enable you to avoid any test or procedure?                      | <input type="radio"/> Yes<br><input type="radio"/> No                                                                                                                                                                                                                                                                                                                                                                                                                                                                              |
| If yes, then what test was prevented:                                                | <input type="text"/>                                                                                                                                                                                                                                                                                                                                                                                                                                                                                                               |
| Q3: Did the FAPI PET result in any additional test or procedure?                     | <input type="radio"/> Yes<br><input type="radio"/> No                                                                                                                                                                                                                                                                                                                                                                                                                                                                              |
| If yes, then what test was performed:                                                | <input type="text"/>                                                                                                                                                                                                                                                                                                                                                                                                                                                                                                               |
| Q4: Did FAPI PET findings trigger a planned biopsy/tissue sampling?                  | <input type="radio"/> Yes<br><input type="radio"/> No                                                                                                                                                                                                                                                                                                                                                                                                                                                                              |
| Q5: Based on FAPI PET findings, what is your treatment plan? (Select all that apply) | <input type="checkbox"/> Surgery/local resection<br><input type="checkbox"/> Radiation therapy or similar local targeting<br><input type="checkbox"/> Chemotherapy<br><input type="checkbox"/> Hormone therapy<br><input type="checkbox"/> Immune therapy<br><input type="checkbox"/> Radionuclide therapy<br><input type="checkbox"/> Bone targeted therapy<br><input type="checkbox"/> Modify dose of existing therapy<br><input type="checkbox"/> Active surveillance<br><input type="checkbox"/> Other (please describe below) |
| What was the other treatment                                                         | <input type="text"/>                                                                                                                                                                                                                                                                                                                                                                                                                                                                                                               |
| Name of person signing the form                                                      | <input type="text"/>                                                                                                                                                                                                                                                                                                                                                                                                                                                                                                               |
| Please sign this form                                                                | <div><div>DATE NAME</div><input type="text"/></div>                                                                                                                                                                                                                                                                                                                                                                                                                                                                                |

**Supplemental Figure 3.** Patient-based immunohistochemical analysis of GLUT1 and FAP expression of primary tumor samples

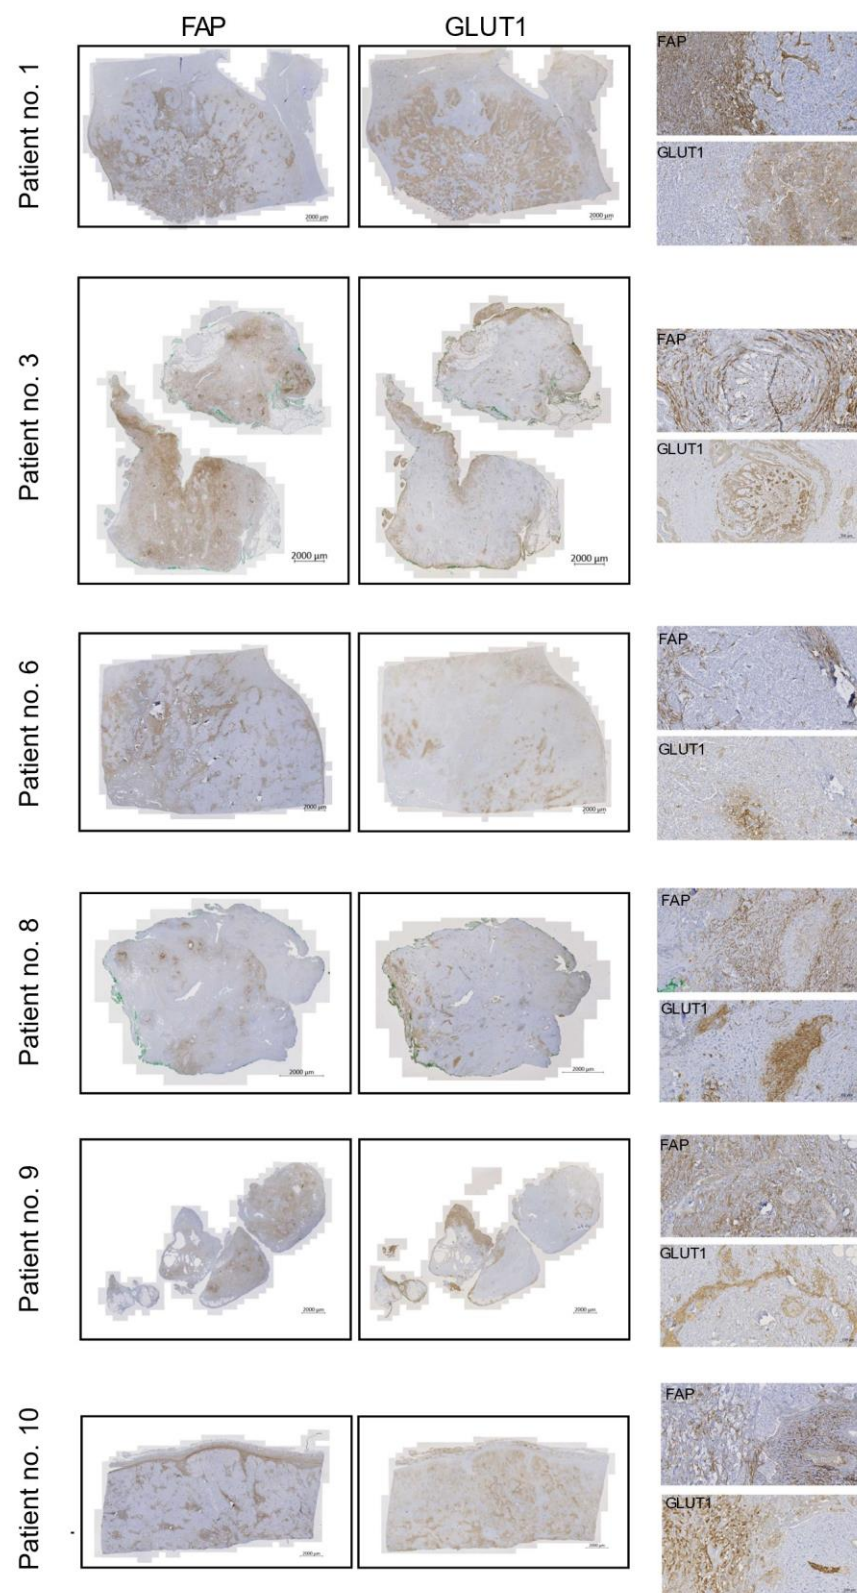

Abbreviations: FAP: fibroblast activation protein, GLUT1: glucose transporter 1

**Supplemental Table 1.** Imaging ( $^{68}\text{Ga}$ -FAPI-46 and  $^{18}\text{F}$ -FDG PET/CT / PET/MRI) and immunohistochemical target expression

| Pat. No.      | $^{68}\text{Ga}$ -FAPI-46<br>imaging | $^{68}\text{Ga}$ -FAPI-46<br>(SUV <sub>max</sub> ) | $^{68}\text{Ga}$ -FAPI-46<br>(SUV <sub>mean</sub> ) | $^{68}\text{Ga}$ -FAPI-46<br>(SUV <sub>peak</sub> ) | IHC FAP<br>stroma grade | $^{18}\text{F}$ -FDG<br>imaging | $^{18}\text{F}$ -FDG<br>(SUV <sub>max</sub> ) | $^{18}\text{F}$ -FDG<br>(SUV <sub>mean</sub> ) | $^{18}\text{F}$ -FDG<br>(SUV <sub>peak</sub> ) | IHC GLUT1<br>tumor grade |
|---------------|--------------------------------------|----------------------------------------------------|-----------------------------------------------------|-----------------------------------------------------|-------------------------|---------------------------------|-----------------------------------------------|------------------------------------------------|------------------------------------------------|--------------------------|
| 1             | PET/CT                               | 14.3                                               | 7.9                                                 | 9.9                                                 | 3                       | PET/MRI                         | 6.3                                           | 3.6                                            | 4.9                                            | 2-3                      |
| 2             | PET/CT                               | 17.5                                               | 10.2                                                | 13.5                                                | N.A.                    | PET/CT                          | 5.1                                           | 3.1                                            | 4.4                                            | N.A.                     |
| 3             | PET/CT                               | 14.5                                               | 7.3                                                 | 8.7                                                 | 3                       | PET/CT                          | 8.0                                           | 4.1                                            | 5.7                                            | 2                        |
| 4             | PET/CT                               | 28.6                                               | 16.7                                                | 24.4                                                | N.A.                    | PET/CT                          | 5.2                                           | 3.4                                            | 4.5                                            | N.A.                     |
| 5             | PET/CT                               | 11.4                                               | 5.8                                                 | 7.5                                                 | N.A.                    | PET/CT                          | 11.6                                          | 6.8                                            | 7.4                                            | N.A.                     |
| 6             | PET/CT                               | 9.3                                                | 5.0                                                 | 8.0                                                 | 2-3                     | PET/CT                          | 4.0                                           | 2.6                                            | 3.6                                            | 1-2                      |
| 7             | PET/CT                               | 25.4                                               | 13.8                                                | 19.3                                                | N.A.                    | N.A.                            | N.A.                                          | N.A.                                           | N.A.                                           | N.A.                     |
| 8             | PET/CT                               | N.A.                                               | N.A.                                                | N.A.                                                | 3                       | PET/CT                          | N.A.                                          | N.A.                                           | N.A.                                           | 1-2                      |
| 9             | PET/CT                               | 9.8                                                | 6.0                                                 | 7.8                                                 | 2-3                     | PET/CT                          | 12.6                                          | 8.0                                            | 9.6                                            | 1-2                      |
| 10            | PET/CT                               | 7.7                                                | 4.8                                                 | 4.9                                                 | 2-3                     | PET/CT                          | 9.2                                           | 5.3                                            | 3.9                                            | 1-2                      |
| <b>Median</b> |                                      | <b>14.3</b>                                        | <b>7.3</b>                                          | <b>8.7</b>                                          |                         |                                 | <b>7.2</b>                                    | <b>3.9</b>                                     | <b>4.7</b>                                     |                          |
| <b>(IQR)</b>  |                                      | <b>(7.3)</b>                                       | <b>(4.4)</b>                                        | <b>(5.7)</b>                                        |                         |                                 | <b>(4.6)</b>                                  | <b>(2.4)</b>                                   | <b>(1.9)</b>                                   |                          |

Abbreviations: IHC: immunohistochemistry, N.A.: not available, SUV<sub>max</sub>: maximum standardized uptake value, SUV<sub>mean</sub>: mean standardized uptake value, SUV<sub>peak</sub>: peak standardized uptake value, IQR: interquartile range.
